# Supplementary material for: Mechanisms and origins of regioselectivities of nickel-catalyzed β,δ-vinylarylation of alkenyl esters with vinyl triflates and arylzinc reagents
Source: Royal Society of Chemistry journal article supplement (doi:10.1039/d1qo01153g), 2021-01-01
Supplement: d1qo01153g1.pdf [file d1qo01153g1.pdf]

## Supporting Information

### Mechanisms and Origins of Regioselectivities of Nickel-Catalyzed $\beta,\delta$ - Vinylarylation of Alkenyl Esters with Vinyl Triflates and Arylzinc Reagents

Yupan Li, Wan Xu, Ting Wang, Hui Chen and Juan Li\*

Department of Chemistry, Guangdong Provincial Key Laboratory of Functional  
Supramolecular Coordination Materials and Applications, Jinan University,  
Guangzhou, Guangdong 510632, P. R. China

\*Corresponding author. Email: tchjli@jnu.edu.cn (J. Li)

---

### Table of Contents

---

|                   |                                                                                    |     |
|-------------------|------------------------------------------------------------------------------------|-----|
| <b>Section 1</b>  | Other possible isomers and conformers (Schemes S1-S9)                              | S2  |
| <b>Section 2</b>  | Optimization with D3 dispersion correction (Fig. S1)                               | S6  |
| <b>Section 3</b>  | Optimization with M06 and B97D methods (Fig. S2)                                   | S6  |
| <b>Section 4</b>  | Two-4-PhPy-coordination mode (Scheme S10)                                          | S7  |
| <b>Section 5</b>  | Optimization along quartet state (Scheme S11)                                      | S7  |
| <b>Section 6</b>  | Other possible pathways to afford product <b>2a</b> (Figs. S3-S4)                  | S8  |
| <b>Section 7</b>  | Other possible pathways to afford product <b>4a</b> (Fig. S5)                      | S9  |
| <b>Section 8</b>  | Other possible pathways to afford regioisomer <b>5a</b> (Figs. S6-S8)              | S9  |
| <b>Section 9</b>  | Other possible pathways to afford regioisomer <b>6a</b> (Fig. S9)                  | S11 |
| <b>Section 10</b> | Other possible pathways to afford regioisomer <b>7a</b> (Fig. S10)                 | S11 |
| <b>Section 11</b> | Pathway to afford regioisomer <b>8a</b> (Fig. S11)                                 | S12 |
| <b>Section 12</b> | $\alpha$ -H elimination step (Fig. S12)                                            | S13 |
| <b>Section 13</b> | Relaxed energy scans for MECP (Fig. S13)                                           | S14 |
| <b>Section 14</b> | Calculated Ph-migration processes for substrates lacking an $\alpha$ -H (Fig. S14) | S14 |
| <b>Section 15</b> | Optimized structures of <b>TS5a-2</b> , <b>TS7a</b> and <b>TS11a</b> (Fig. S15)    | S15 |
| <b>Section 16</b> | Energies (in hartree) for all TSs and intermediates                                | S15 |
| <b>Section 17</b> | Calculated imaginary frequencies of all transition states species                  | S21 |

## Section 1. Other possible isomers and conformers

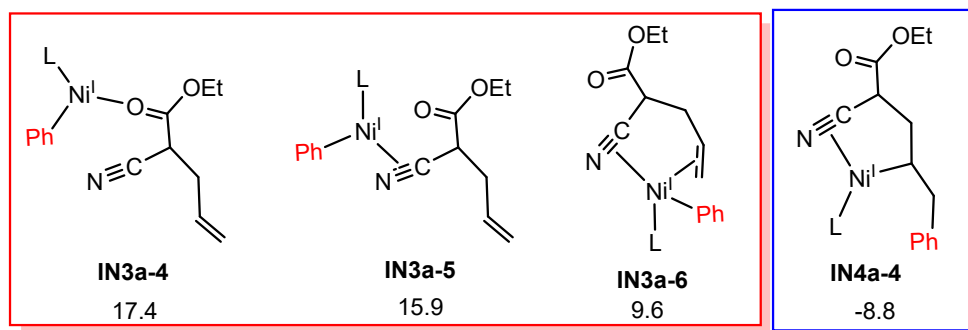

**Scheme S1** Other possible isomers of intermediate **IN3a-1** and **IN4a-1**. Values shown are relative free energies in kcal/mol.

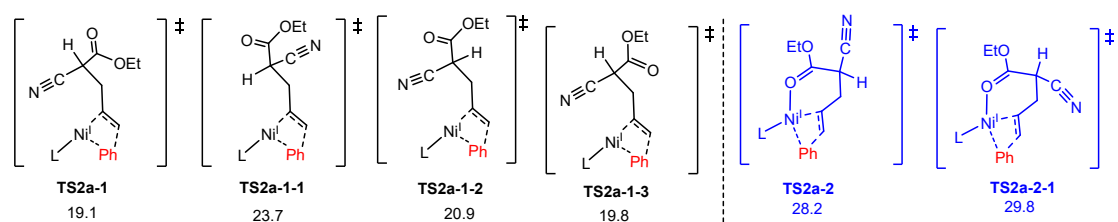

**Scheme S2** Other possible conformers of transition states **TS2a-1** and **TS2a-2**. Values shown are relative free energies in kcal/mol.

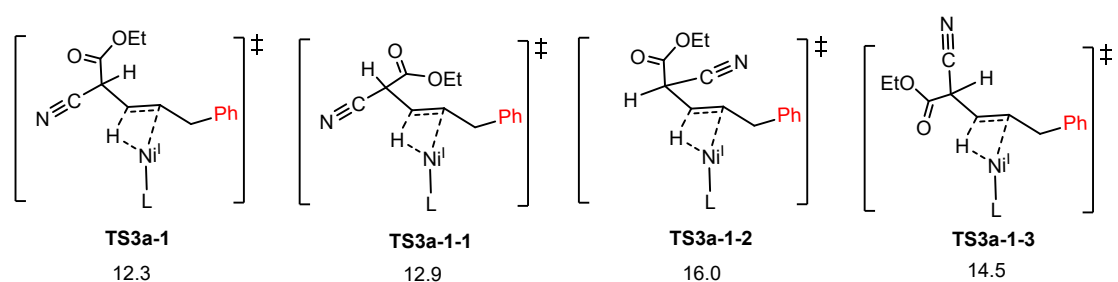

**Scheme S3** Other possible conformers of transition state **TS3a-1**. Values shown are relative free energies in kcal/mol.

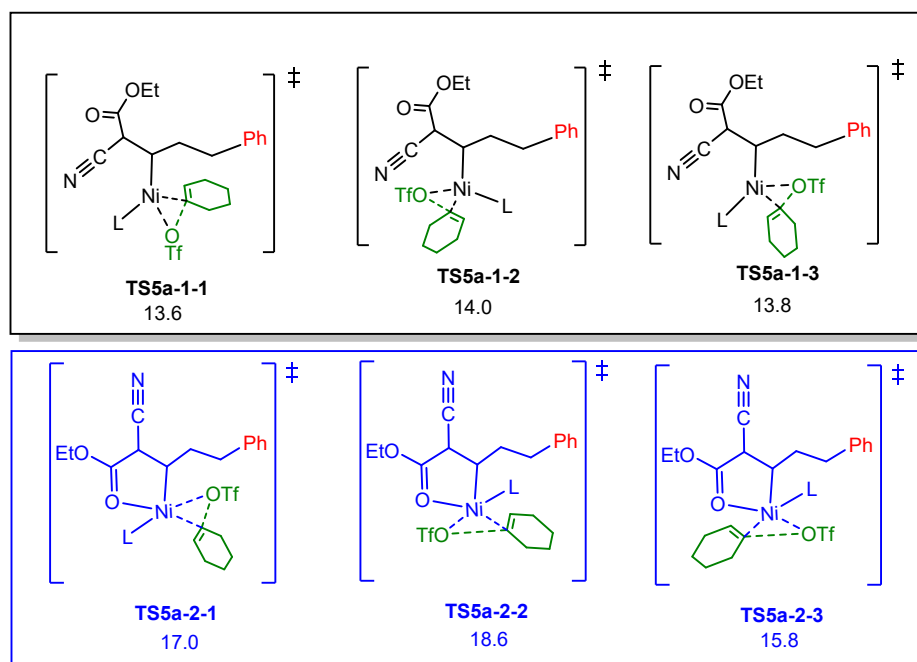

**Scheme S4** Other possible isomers of transition states **TS5a-1** and **TS5a-2**. Values shown are relative free energies in kcal/mol.

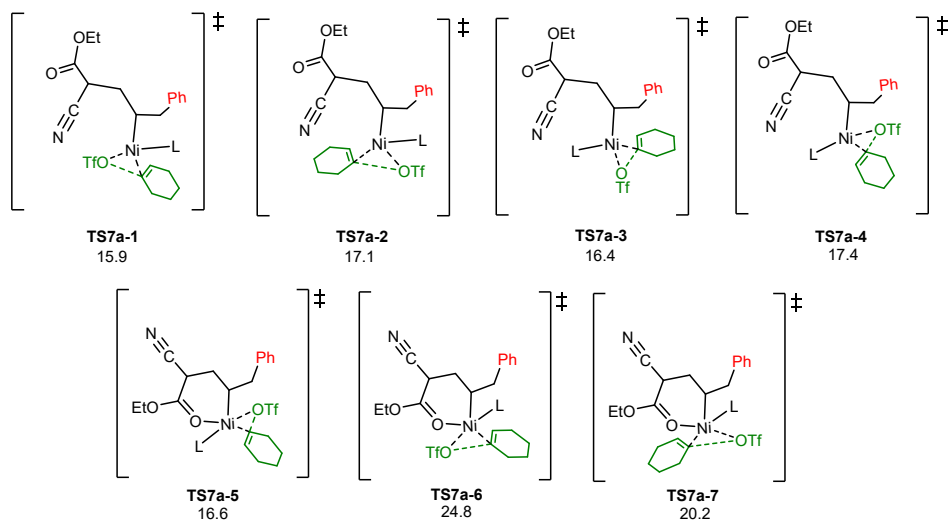

**Scheme S5** Other possible isomers of transition states **TS7a**. Values shown are relative free energies in kcal/mol.

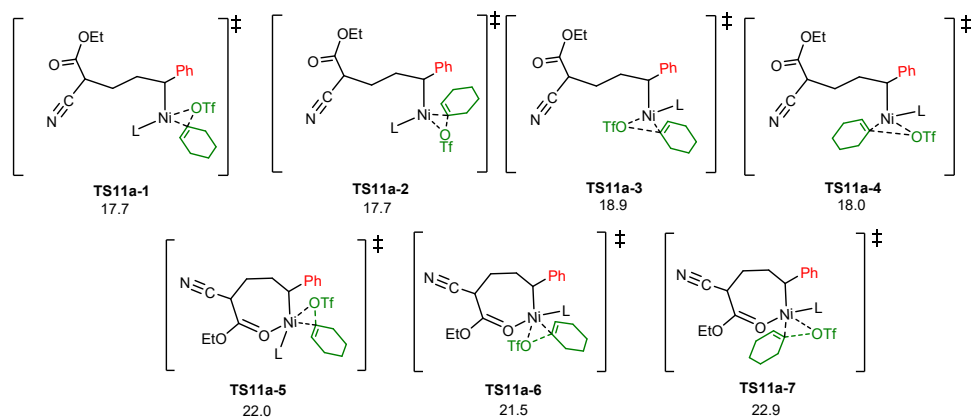

**Scheme S6** Other possible isomers of transition states **TS11a**. Values shown are relative free energies in kcal/mol.

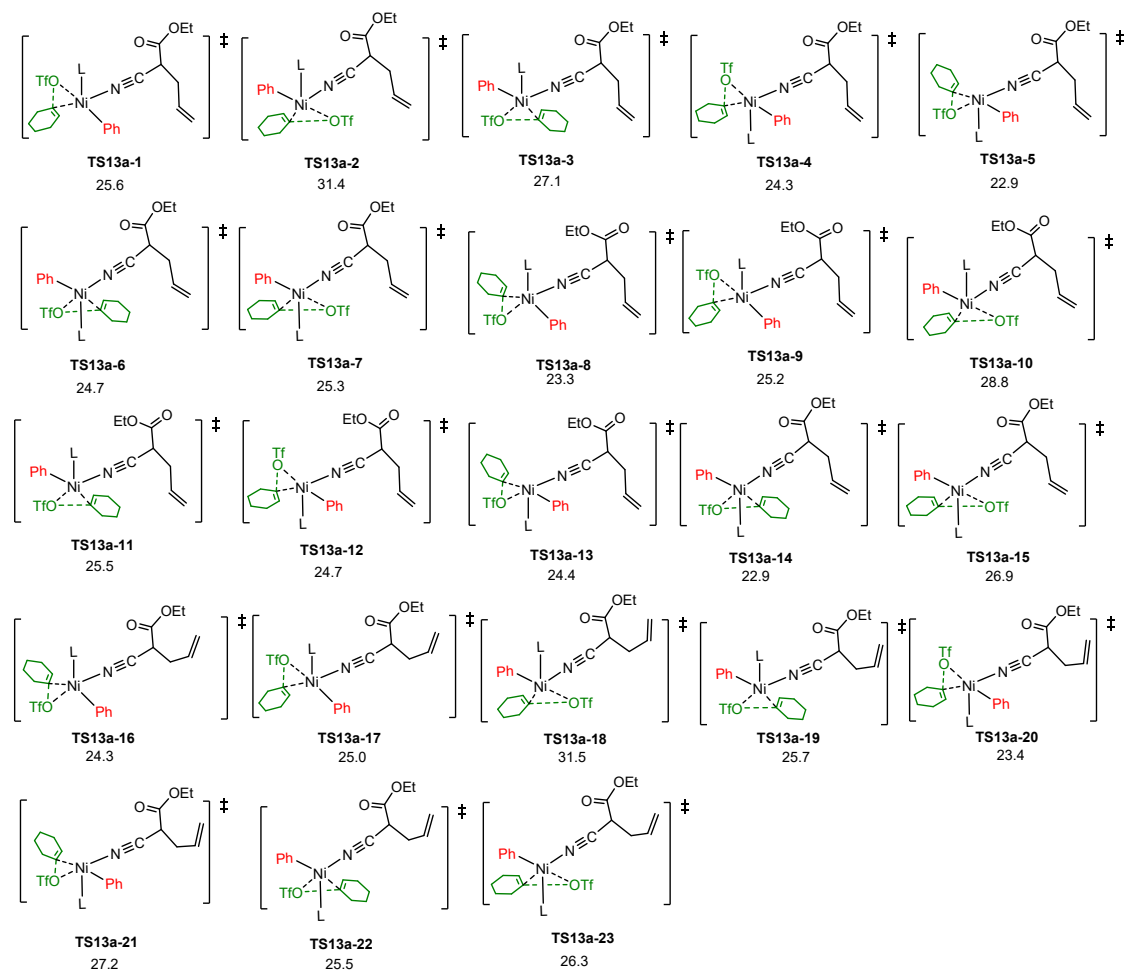

**Scheme S7** Other possible isomers and conformers of transition state **TS13a**. Values shown are relative free energies in kcal/mol.

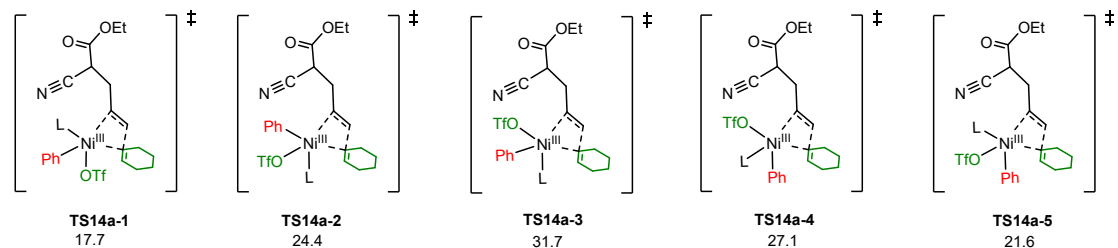

**Scheme S8** Other possible isomers of transition state **TS14a**. Values shown are relative free energies in kcal/mol.

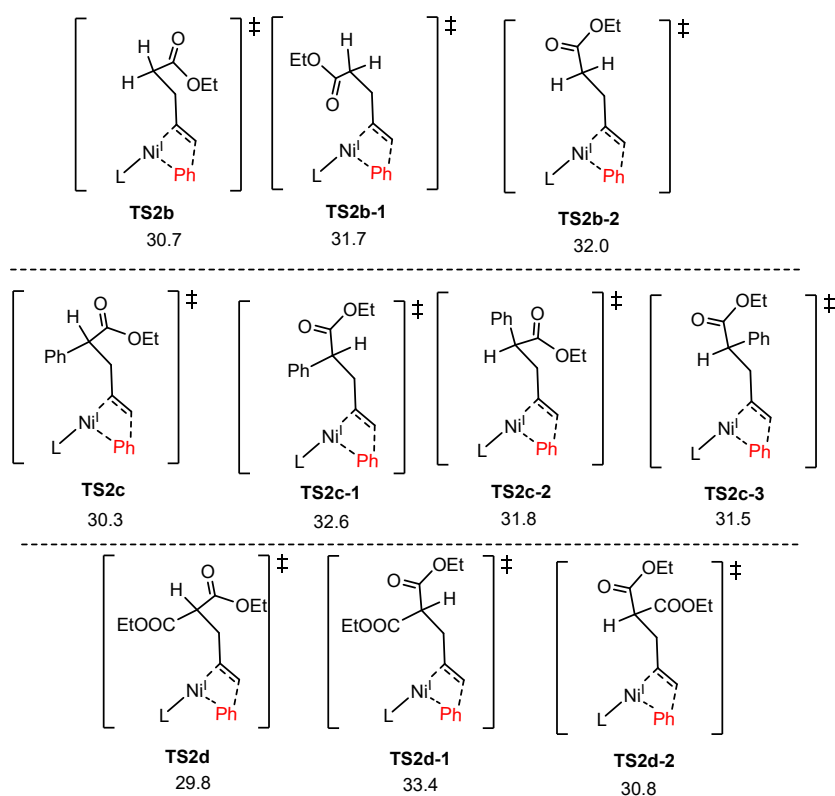

**Scheme S9** Conformers for transition states of the carbometallation step. Values shown are relative free energies in kcal/mol.

## Section 2. Optimization with D3 dispersion correction

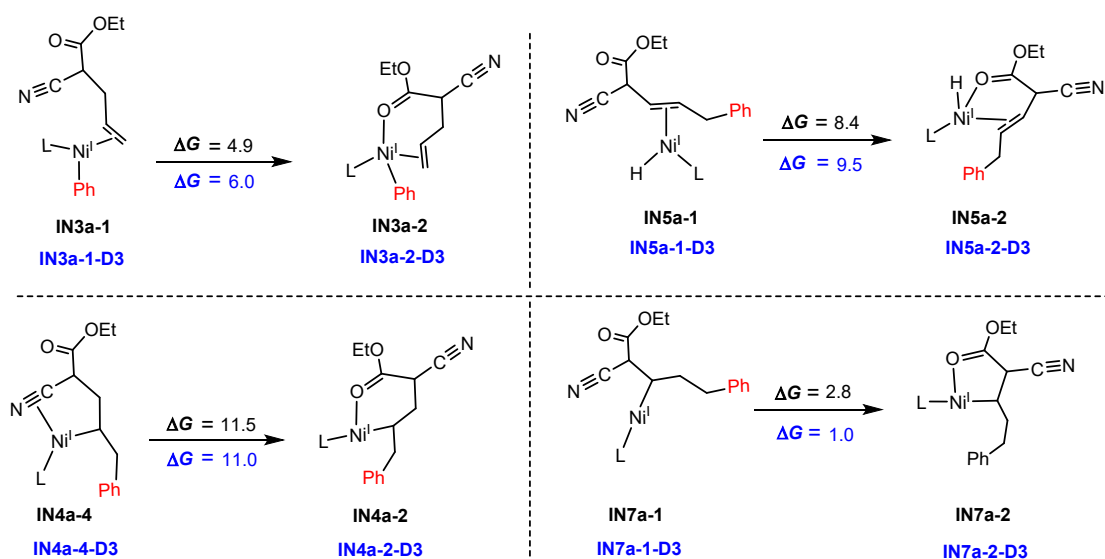

**Fig. S1** Calculated free energy difference for key species using the M06/BS2//B3LYP/BS1 and M06/BS2//B3LYP-D3/BS1 levels. Values shown are relative free energies in kcal/mol.

## Section 3. Optimization with M06 and B97D methods

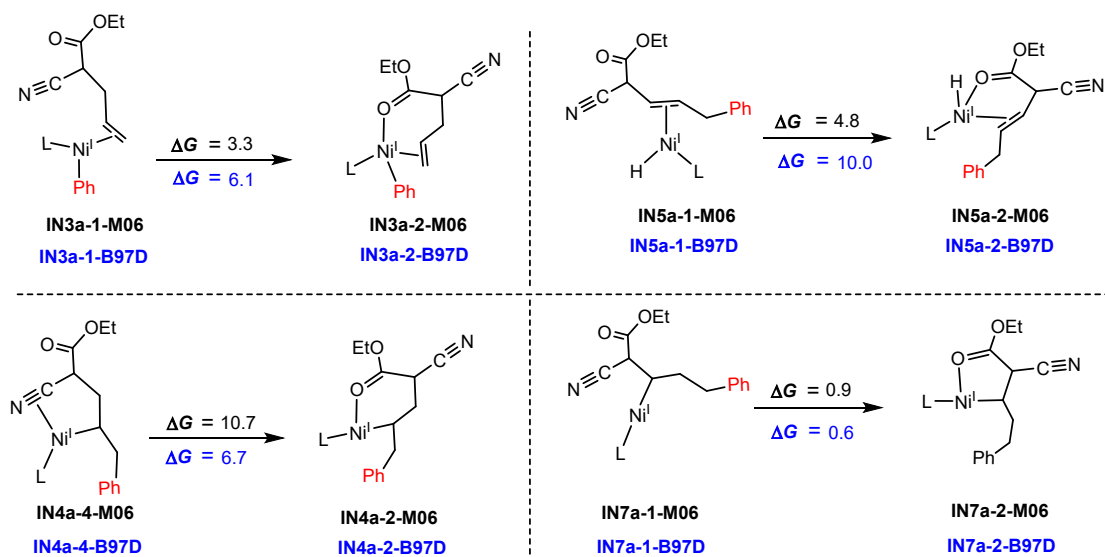

**Fig. S2** Calculated free energy difference for key species using the M06/BS2//M06/BS1 and M06/BS2//B97D/BS1 levels. Values shown are relative free energies in kcal/mol.

## Section 4. Two-4-PhPy-coordination mode

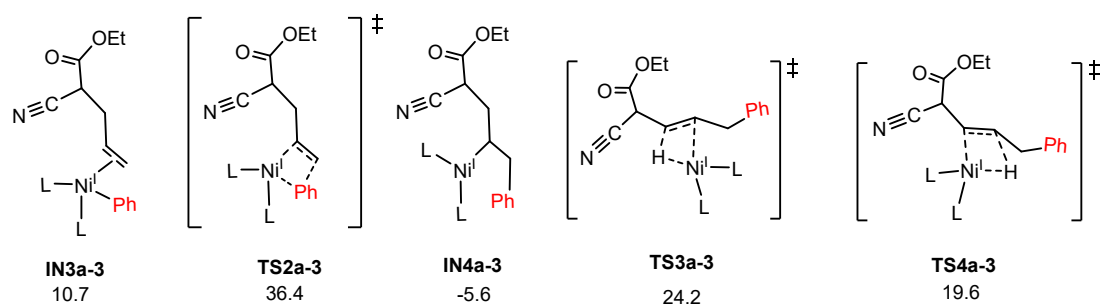

**Scheme S10** Two-4-PhPy-coordination mode for key intermediates and transition states. Values shown are relative free energies in kcal/mol.

## Section 5. Optimization along quartet state

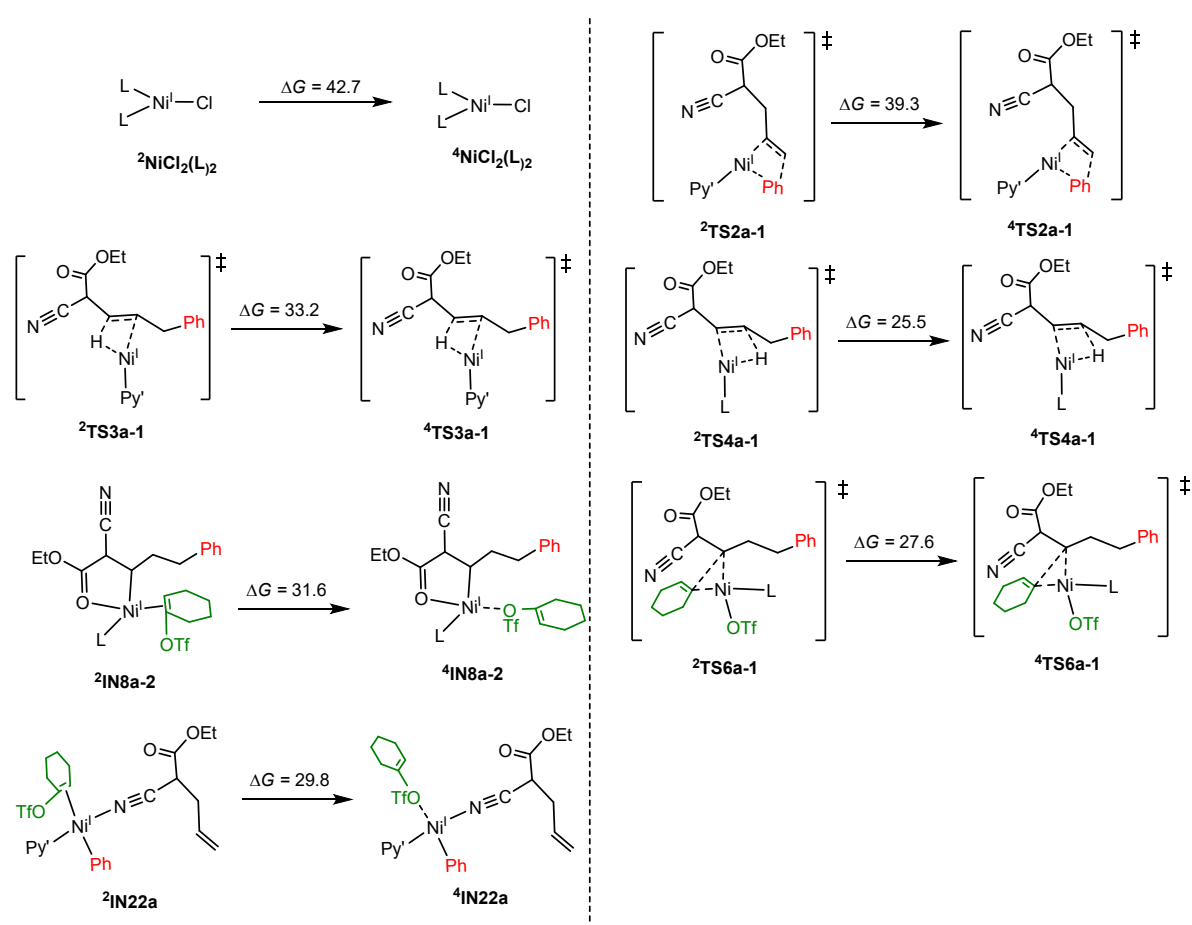

**Scheme S11** Optimized key intermediates and transition states in quartet state. Values shown are relative free energies in kcal/mol.

## Section 6. Other possible pathways to afford product 2a

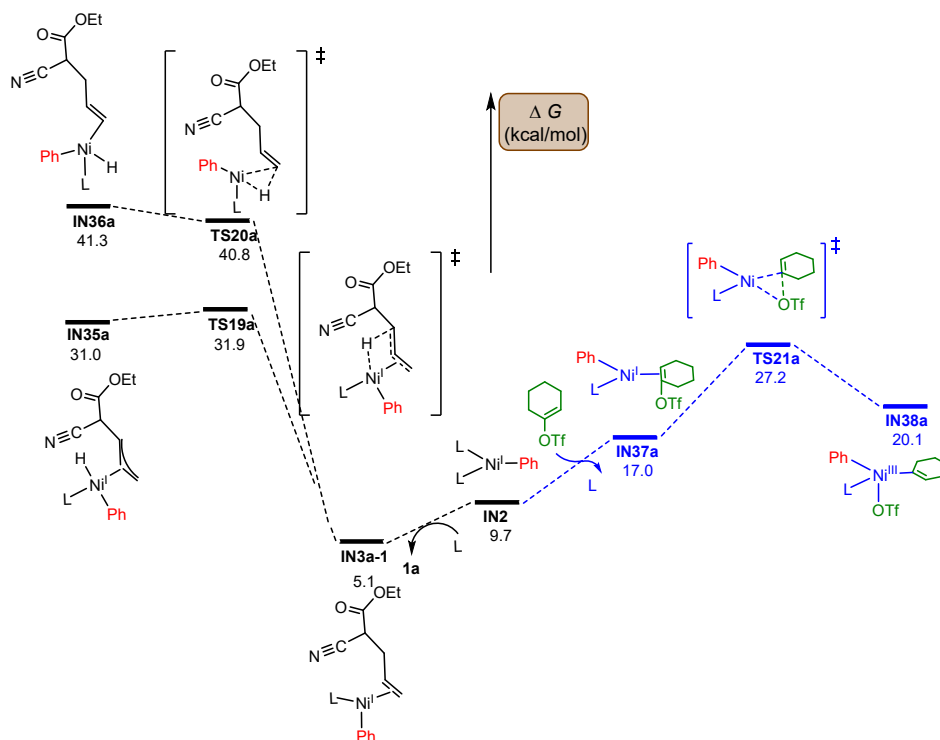

**Fig. S3** Calculated energy profiles for  $\beta$ -H elimination,  $\delta$ -H elimination and oxidative addition steps from **IN2**, respectively. Values shown are relative free energies in kcal/mol.

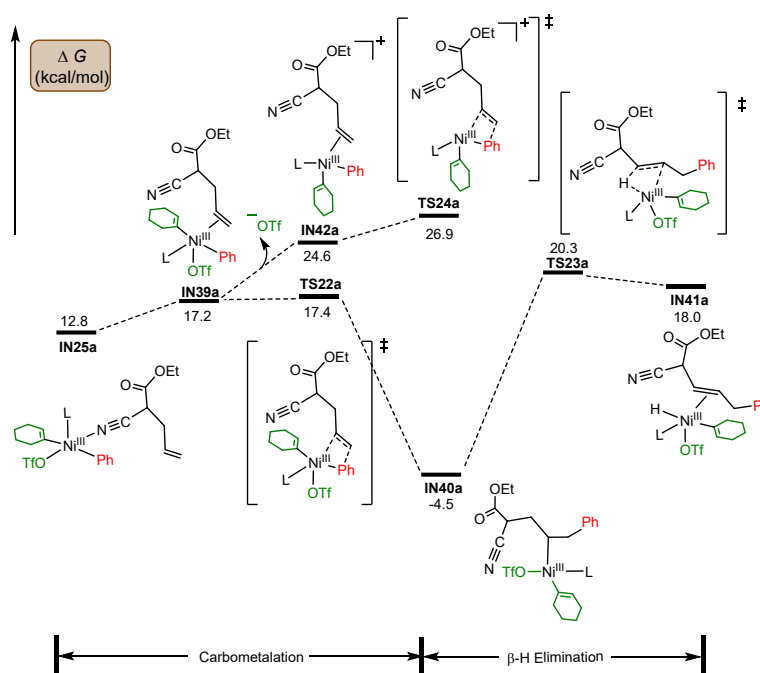

**Fig. S4** Calculated energy profiles for carbometallation and  $\beta$ -H elimination steps



from **IN25a**, respectively. Values shown are relative free energies in kcal/mol.

### Section 7. Other possible pathways to afford product 4a

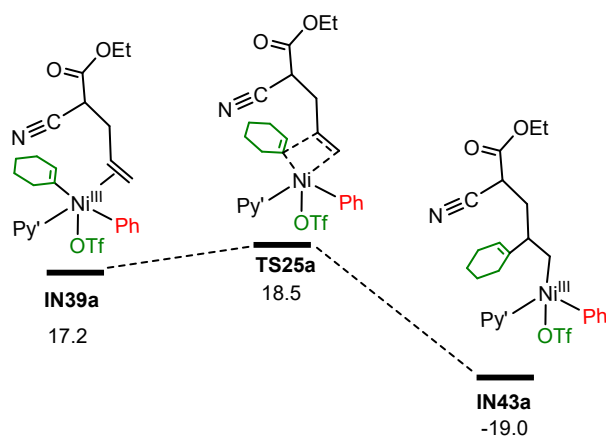

**Fig. S5** Calculated energy profiles for carbometallation step from **IN39a**. Values shown are relative free energies in kcal/mol.

### Section 8. Other possible pathways to afford regioisomer 5a

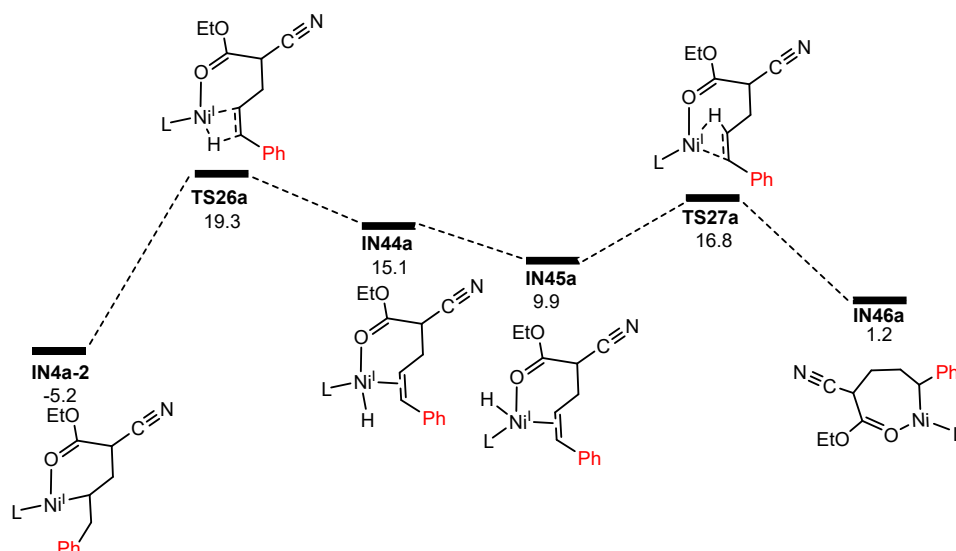

**Fig. S6** Calculated energy profiles for  $\beta$ -H elimination and Ni-H reinsertion steps from **IN4a-2**, respectively. Values shown are relative free energies in kcal/mol.

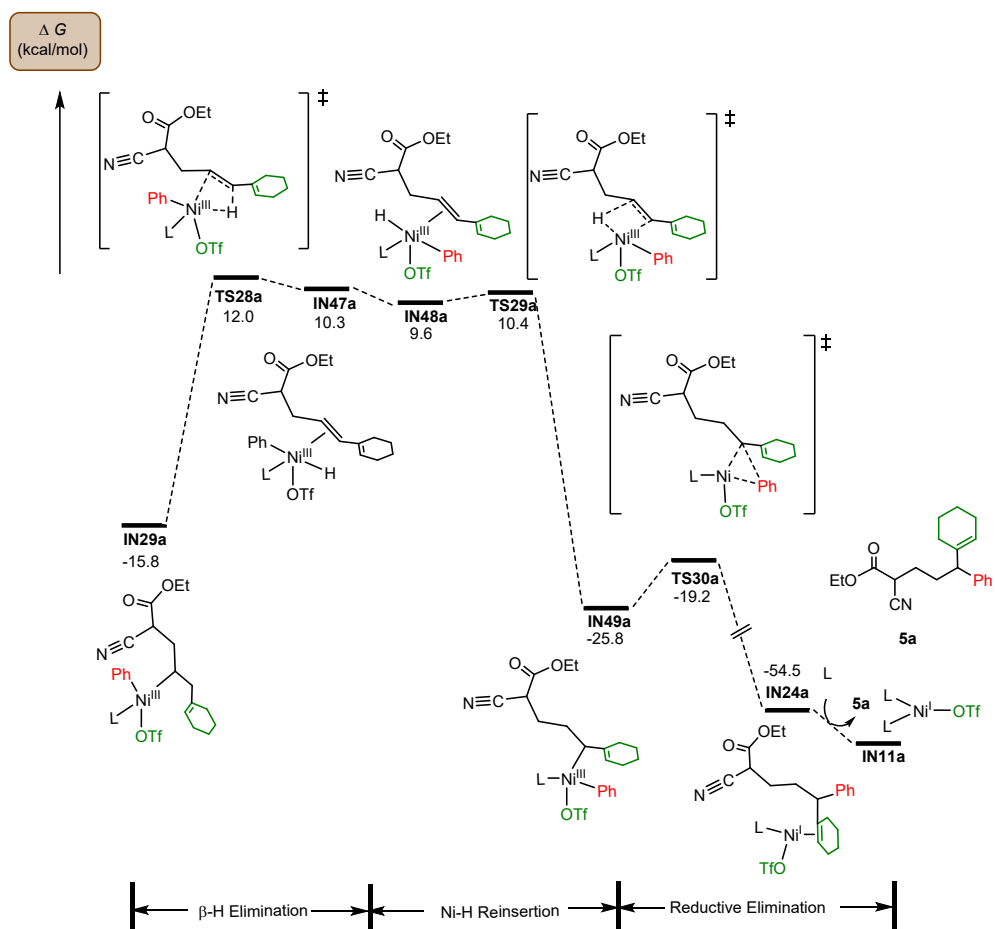

**Fig. S7** Calculated energy profiles for affording regioisomer **5a** from **IN29a**. Values shown are relative free energies in kcal/mol.

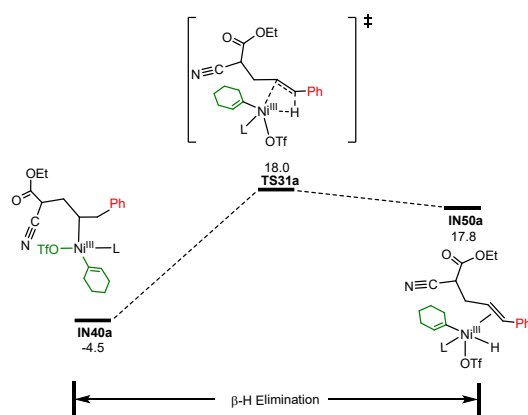

**Fig. S8** Calculated energy profiles for  $\beta$ -H elimination step from **IN40a**. Values shown are relative free energies in kcal/mol.

## Section 9. Other possible pathways to afford regioisomer 6a

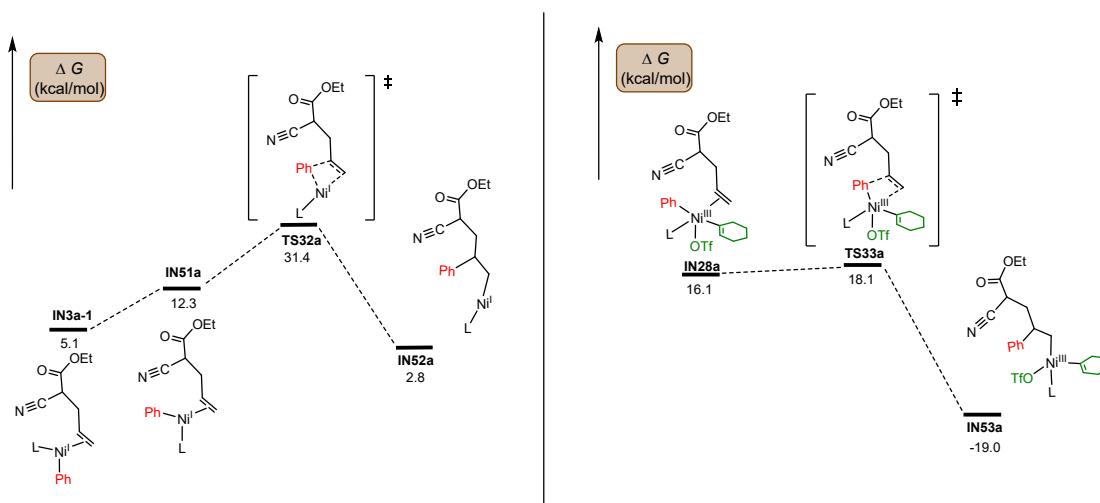

**Fig. S9** Calculated energy profiles for carbometallation step from **IN3a-1** and **IN28a**, respectively. Values shown are relative free energies in kcal/mol.

## Section 10. Other possible pathways to afford regioisomer 7a

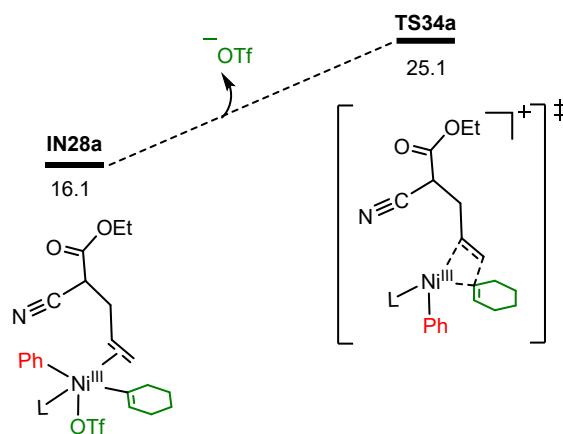

**Fig. S10** Calculated energy profiles for carbometallation step from **IN28a**. Values shown are relative free energies in kcal/mol.

## Section 11. Pathway to afford 8a

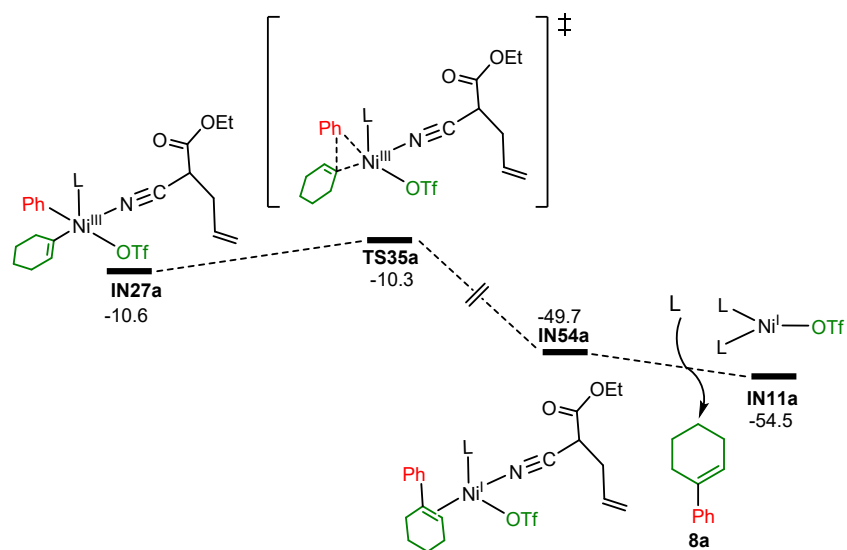

**Fig. S11** Calculated energy profiles for oxidative addition step from **IN27a**, respectively. Values shown are relative free energies in kcal/mol.

## Section 12. $\alpha$ -H elimination step

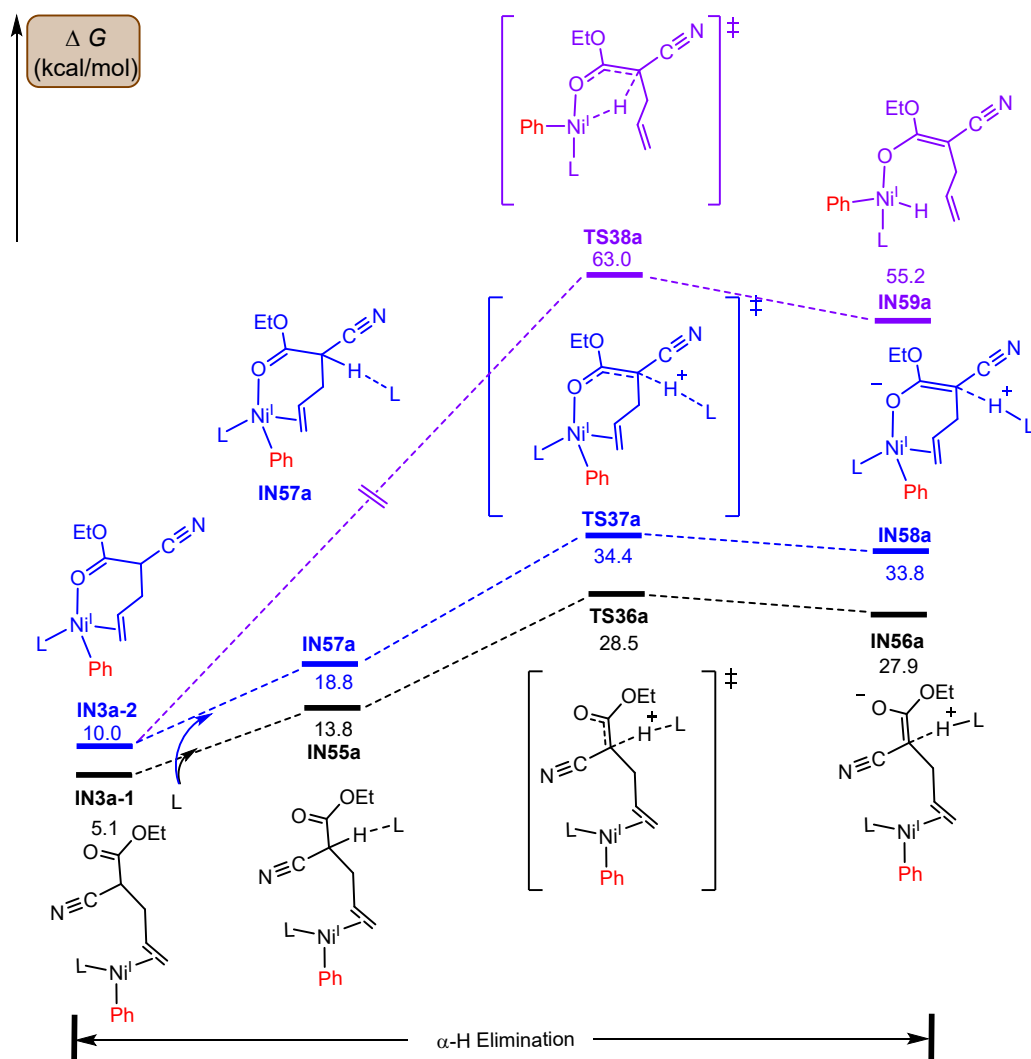

**Fig. S12** Calculated energy profiles for  $\alpha$ -H elimination step from IN3a-1 and IN3a-2, respectively. Values shown are relative free energies in kcal/mol.

## Section 13. Relaxed energy scans for MECP

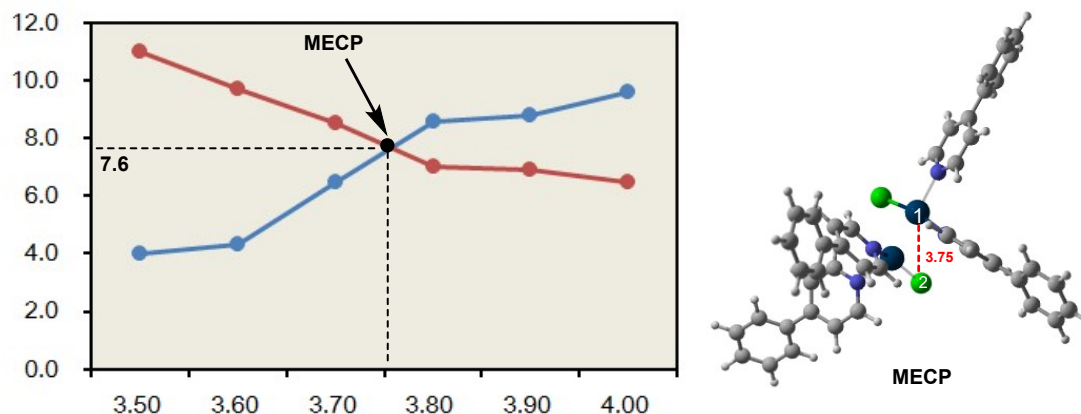

**Fig. S13** Relaxed energy scan in the singlet (blue line) and triplet (red line) states for the comproportionation of  $\text{Ni}^{\text{II}}$  with  $\text{Ni}^0$ . The structure of MECP is shown. Energies are relative to  $^1\text{In}^{\text{f}}$  and in kcal/mol. Distance of Ni1-Cl2 is given in angstroms.

## Section 14. Calculated Ph-migration processes for substrates lacking an $\alpha\text{-H}$

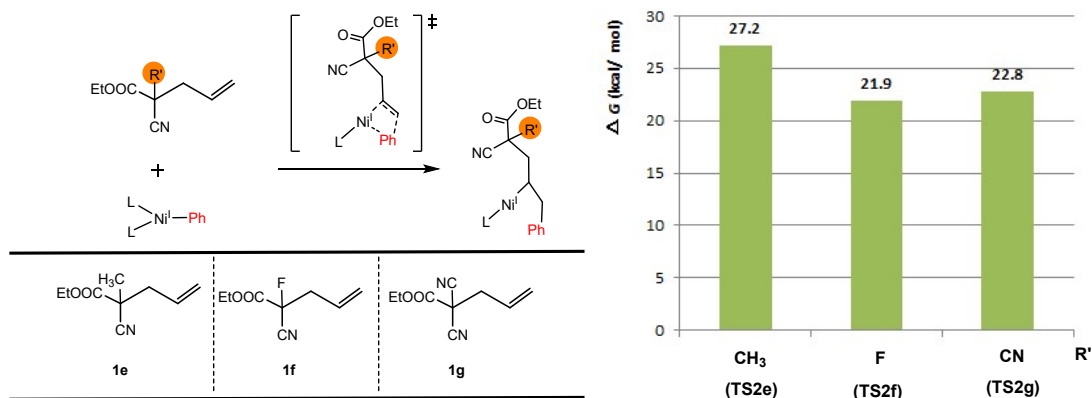

**Fig. S14** Calculated Ph-migration processes for three substrates with different  $\text{C}_\alpha$  position of substituents. Values shown are relative free energies in kcal/mol.

## Section 15. Optimized structures of TS5a-2, TS7a and TS11a

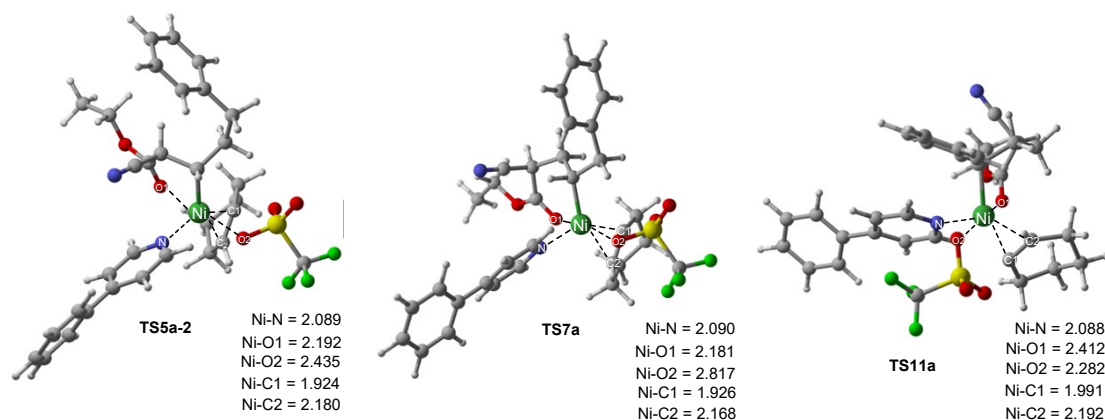

**Fig. S15** Optimized structures of TS5a-2, TS7a and TS11a along with interatomic distances (in angstroms).

## Section 16. Energies (in hartree) of All TSs and Intermediates.

| Geometry                    | $E_0$        | E            | $H_{353.15}$ | $G_{353.15}$ | $E_{(sol,M06)}$ |
|-----------------------------|--------------|--------------|--------------|--------------|-----------------|
| 1a                          | -516.456370  | -516.440027  | -516.438909  | -516.506770  | -516.444743     |
| 1b                          | -424.232083  | -424.218012  | -424.216894  | -424.279251  | -424.249780     |
| 1c                          | -655.198602  | -655.178152  | -655.177033  | -655.255526  | -655.176042     |
| 1d                          | -691.350366  | -691.328552  | -691.327433  | -691.409598  | -691.368612     |
| 1e                          | -555.752405  | -555.734109  | -555.732991  | -555.803916  | -555.748430     |
| 1f                          | -615.694112  | -615.676640  | -615.675521  | -615.745520  | -615.681416     |
| 1g                          | -608.687623  | -608.668844  | -608.667726  | -608.740763  | -608.6446672    |
| 1h                          | -520.792271  | -520.774534  | -520.773415  | -520.844736  | -520.760875     |
| 2a                          | -981.952362  | -981.921613  | -981.920495  | -982.021801  | -981.927886     |
| 3a                          | -747.441045  | -747.418336  | -747.417218  | -747.502775  | -747.385300     |
| 4a                          | -981.969542  | -981.938597  | -981.937479  | -982.041936  | -981.945684     |
| 5a                          | -981.959786  | -981.928902  | -981.927784  | -982.029989  | -981.934521     |
| 6a                          | -981.967326  | -981.936479  | -981.935361  | -982.037066  | -981.945419     |
| 7a                          | -981.970675  | -981.939721  | -981.938602  | -982.041839  | -981.946571     |
| 8a                          | -465.480142  | -465.466285  | -465.465167  | -465.524864  | -465.452253     |
| $^1\text{NiCl}_2\text{L}_2$ | -2049.850884 | -2049.817652 | -2049.816534 | -2049.926846 | -2049.706394    |
| $^3\text{NiCl}_2\text{L}_2$ | -2049.825881 | -2049.791806 | -2049.790688 | -2049.905467 | -2049.699410    |
| $^2\text{NiClL}_2$          | -1589.616899 | -1589.585474 | -1589.584356 | -1589.691374 | -1589.470057    |
| NiHL <sub>2</sub>           | -1783.977728 | -1783.953658 | -1783.952540 | -1784.036759 | -1129.771129    |
| Ph <sub>2</sub> Zn          | -690.279288  | -690.263561  | -690.262443  | -690.329488  | -690.234900     |
| PhZnCl                      | -918.984410  | -918.974209  | -918.973091  | -919.026074  | -918.975145     |
| Ph-Ph                       | -463.127090  | -463.114714  | -463.113595  | -463.170160  | -463.053761     |

|                               |              |              |              |              |               |
|-------------------------------|--------------|--------------|--------------|--------------|---------------|
| 4-PhPy                        | -479.176056  | -479.163918  | -479.162800  | -479.219097  | -479.096557   |
| ZnCl <sub>2</sub>             | -1147.676799 | -1147.670982 | -1147.669863 | -1147.710595 | -1147.700701  |
| cyclohexenyl<br>triflate      | -1195.282107 | -1195.263981 | -1195.262863 | -1195.334945 | -1195.292094  |
| -OTf                          | -961.531547  | -961.522154  | -961.521035  | -961.571627  | -961.550777   |
| PhZnOTf                       | -1420.147292 | -1420.128091 | -1420.126973 | -1420.203646 | -1420.140780  |
| <sup>1</sup> INa              | -2740.133900 | -2740.082147 | -2740.081028 | -2740.241872 | -2739.951457  |
| <sup>3</sup> INa              | -2740.160688 | -2740.108274 | -2740.107156 | -2740.271999 | -2739.965399  |
| <sup>1</sup> TSa              | -2740.102239 | -2740.051647 | -2740.050529 | -2740.201567 | -2739.936521  |
| <sup>3</sup> TSa              | -2740.142840 | -2740.094783 | -2740.093665 | -2740.238901 | -2739.964205  |
| <sup>1</sup> INb              | -2740.140812 | -2740.089383 | -2740.088265 | -2740.245628 | -2739.968843  |
| <sup>3</sup> INb              | -2740.142967 | -2740.091106 | -2740.089987 | -2740.245956 | -2739.967456  |
| <sup>1</sup> TSb              | -2740.115412 | -2740.064786 | -2740.063668 | -2740.217108 | -2739.948136  |
| <sup>3</sup> TSb              | -2740.129818 | -2740.079607 | -2740.078489 | -2740.231234 | -2739.950616  |
| <sup>1</sup> INc              | -2740.134439 | -2740.083841 | -2740.082722 | -2740.231503 | -2739.973642  |
| <sup>3</sup> INc              | -2740.136747 | -2740.084814 | -2740.083695 | -2740.240229 | -2739.956971  |
| <sup>1</sup> INd              | -1592.447185 | -1592.403326 | -1592.402207 | -1592.537296 | -1592.240233  |
| <sup>3</sup> INd              | -1592.432459 | -1592.387664 | -1592.386545 | -1592.526339 | -1592.210460  |
| <sup>1</sup> TSc              | -1592.414885 | -1592.371560 | -1592.370441 | -1592.503218 | -1592.216987  |
| <sup>3</sup> TSc              | -1592.383082 | -1592.339117 | -1592.337999 | -1592.474091 | -1592.171923  |
| <sup>1</sup> INe              | -1592.452492 | -1592.409073 | -1592.407955 | -1592.541337 | -1592.256100  |
| <sup>3</sup> INe              | -1592.443375 | -1592.398989 | -1592.397871 | -1592.536036 | -1592.237534  |
| <sup>1</sup> NiL <sub>2</sub> | -1129.327416 | -1129.298817 | -1129.297699 | -1129.396456 | -1129.186178  |
| <sup>3</sup> NiL <sub>2</sub> | -1129.317633 | -1129.289073 | -1129.287955 | -1129.388285 | -1129.166492  |
| <sup>1</sup> INf              | -3179.199153 | -3179.134565 | -3179.133447 | -3179.319611 | -3178.934333  |
| MECP                          | -3179.197337 | -3179.135743 | -3179.134624 | -3179.312943 | -3178.933717  |
| <sup>3</sup> INf              | -3179.243456 | -3179.177446 | -3179.176328 | -3179.373636 | -3178.963654  |
| TS1                           | -2279.871402 | -2279.825164 | -2279.824046 | -2279.966212 | -2279.71897   |
| IN1                           | -2279.896272 | -2279.846606 | -2279.845487 | -2279.996745 | -2279.724435  |
| IN2                           | -1360.888290 | -1360.851035 | -1360.849917 | -1360.974329 | -1360.705736  |
| IN3a-1                        | -1398.175485 | -1398.135118 | -1398.134000 | -1398.262039 | -1398.068617  |
| TS2a-1                        | -1398.140100 | -1398.100720 | -1398.099601 | -1398.227074 | -1398.045576  |
| IN4a-1                        | -1398.197093 | -1398.157748 | -1398.156629 | -1398.283755 | -1398.087865  |
| IN3a-2                        | -1398.170371 | -1398.129957 | -1398.128839 | -1398.257971 | -1398.059603  |
| TS2a-2                        | -1398.130145 | -1398.091031 | -1398.089913 | -1398.214618 | -1398.034639  |
| IN4a-2                        | -1398.185181 | -1398.146113 | -1398.144995 | -1398.269765 | -1398.077403  |
| IN3a-3                        | -1877.355901 | -1877.300850 | -1877.299732 | -1877.464130 | -1877.178510  |
| TS2a-3                        | -1877.308089 | -1877.254310 | -1877.253191 | -1877.412949 | -1877.1407645 |
| IN4a-3                        | -1877.385169 | -1877.331261 | -1877.330142 | -1877.491130 | -1877.209635  |
| TS3a-1                        | -1398.141906 | -1398.102733 | -1398.101615 | -1398.228583 | -1398.054215  |
| IN5a-1                        | -1398.180693 | -1398.140578 | -1398.139459 | -1398.268701 | -1398.064375  |
| TS3a-2                        | -1398.140622 | -1398.101517 | -1398.100398 | -1398.226412 | -1398.038259  |
| IN5a-2                        | -1398.173804 | -1398.134559 | -1398.133440 | -1398.258079 | -1398.055795  |



|         |              |              |              |              |              |
|---------|--------------|--------------|--------------|--------------|--------------|
| IN6a-1  | -1398.177871 | -1398.137924 | -1398.136805 | -1398.264681 | -1398.064628 |
| IN6a-2  | -1398.176959 | -1398.137710 | -1398.136592 | -1398.260278 | -1398.058918 |
| TS4a-1  | -1398.159245 | -1398.119905 | -1398.118786 | -1398.246582 | -1398.054838 |
| IN7a-1  | -1398.200836 | -1398.161457 | -1398.160339 | -1398.288582 | -1398.090341 |
| TS4a-2  | -1398.146166 | -1398.107165 | -1398.106046 | -1398.230332 | -1398.041118 |
| IN7a-2  | -1398.195135 | -1398.155985 | -1398.154866 | -1398.280526 | -1398.088297 |
| IN8a-1  | -2593.475109 | -2593.415964 | -2593.414846 | -2593.585677 | -2593.399341 |
| IN8a-2  | -2593.469738 | -2593.410742 | -2593.409624 | -2593.579260 | -2593.391719 |
| TS5a-1  | -2593.462133 | -2593.403143 | -2593.402025 | -2593.574006 | -2593.377832 |
| TS5a-2  | -2593.464188 | -2593.405344 | -2593.404226 | -2593.574511 | -2593.383227 |
| IN9a-1  | -2593.512596 | -2593.452563 | -2593.451444 | -2593.625598 | -2593.424619 |
| IN9a-2  | -2593.513185 | -2593.453732 | -2593.452613 | -2593.623422 | -2593.426610 |
| TS6a-1  | -2593.500580 | -2593.441144 | -2593.440026 | -2593.613663 | -2593.423268 |
| TS6a-2  | -2593.500893 | -2593.442207 | -2593.441088 | -2593.610224 | -2593.424405 |
| IN10a-1 | -2593.556814 | -2593.497863 | -2593.496744 | -2593.667457 | -2593.491289 |
| IN10a-2 | -2593.566030 | -2593.507422 | -2593.506303 | -2593.674959 | -2593.491965 |
| IN11a   | -2090.798177 | -2090.757424 | -2090.756306 | -2090.887731 | -2090.655183 |
| IN12a   | -2593.470279 | -2593.411229 | -2593.410111 | -2593.580856 | -2593.396202 |
| IN13a   | -2593.459304 | -2593.399926 | -2593.398808 | -2593.569992 | -2593.382252 |
| TS7a    | -2593.455712 | -2593.397004 | -2593.395885 | -2593.565331 | -2593.373699 |
| IN14a   | -2593.478708 | -2593.419236 | -2593.418118 | -2593.587599 | -2593.397409 |
| IN15a   | -2593.515047 | -2593.455334 | -2593.454215 | -2593.625305 | -2593.428915 |
| TS8a    | -2593.502192 | -2593.443126 | -2593.442007 | -2593.613314 | -2593.423379 |
| IN16a   | -2593.574995 | -2593.515699 | -2593.514581 | -2593.687810 | -2593.503022 |
| TS9a    | -1398.154068 | -1398.114729 | -1398.113610 | -1398.242218 | -1398.052068 |
| IN17a   | -1398.177545 | -1398.137515 | -1398.136397 | -1398.265941 | -1398.061788 |
| IN18a   | -1398.179739 | -1398.139756 | -1398.138638 | -1398.268356 | -1398.064186 |
| TS10a   | -1398.159535 | -1398.120300 | -1398.119182 | -1398.246572 | -1398.056871 |
| IN19a   | -1398.197556 | -1398.158238 | -1398.157119 | -1398.284812 | -1398.089728 |
| IN20a   | -2593.460510 | -2593.401473 | -2593.400355 | -2593.569718 | -2593.386579 |
| IN21a   | -2593.456841 | -2593.397919 | -2593.396801 | -2593.565138 | -2593.382856 |
| TS11a   | -2593.455560 | -2593.396457 | -2593.395339 | -2593.565612 | -2593.372817 |
| IN22a   | -2593.494764 | -2593.435231 | -2593.434113 | -2593.604838 | -2593.412599 |
| IN23a   | -2593.511210 | -2593.451269 | -2593.450150 | -2593.621764 | -2593.423573 |
| TS12a   | -2593.499300 | -2593.440057 | -2593.438938 | -2593.610801 | -2593.421846 |
| IN24a   | -2593.559846 | -2593.500600 | -2593.499482 | -2593.671847 | -2593.489916 |
| IN25a   | -1398.185030 | -1398.143989 | -1398.142871 | -1398.275125 | -1398.068498 |
| IN26a   | -2593.454210 | -2593.393214 | -2593.392095 | -2593.569355 | -2593.369669 |
| TS13a   | -2593.446900 | -2593.386051 | -2593.384933 | -2593.561633 | -2593.357476 |
| IN27a   | -2593.468455 | -2593.407187 | -2593.406069 | -2593.583998 | -2593.372996 |
| IN28a   | -2593.452610 | -2593.391888 | -2593.390770 | -2593.565487 | -2593.371546 |
| TS14a   | -2593.452838 | -2593.394331 | -2593.393213 | -2593.560681 | -2593.374852 |
| IN29a   | -2593.510729 | -2593.450944 | -2593.449826 | -2593.622813 | -2593.425425 |

|          |              |              |              |              |              |
|----------|--------------|--------------|--------------|--------------|--------------|
| TS15a    | -2593.497198 | -2593.437825 | -2593.436706 | -2593.610417 | -2593.422899 |
| IN30a    | -2593.590690 | -2593.531273 | -2593.530154 | -2593.704663 | -2593.503779 |
| TS16a    | -2593.457720 | -2593.398419 | -2593.397301 | -2593.569291 | -2593.366355 |
| IN31a    | -2593.456298 | -2593.396070 | -2593.394951 | -2593.569441 | -2593.365733 |
| IN32a    | -2593.458372 | -2593.399350 | -2593.398232 | -2593.569312 | -2593.369999 |
| TS17a    | -2593.456794 | -2593.397592 | -2593.396473 | -2593.569574 | -2593.365982 |
| IN33a    | -2593.510826 | -2593.451162 | -2593.450044 | -2593.622631 | -2593.428375 |
| TS18a    | -2593.498426 | -2593.439252 | -2593.438133 | -2593.609739 | -2593.425074 |
| IN34a    | -2593.588454 | -2593.530015 | -2593.528897 | -2593.701405 | -2593.498042 |
| TS2b     | -1305.902144 | -1305.864876 | -1305.863758 | -1305.986927 | -1305.830443 |
| TS2c     | -1536.866927 | -1536.823493 | -1536.822375 | -1536.958169 | -1536.761429 |
| TS2d     | -1573.020391 | -1572.975708 | -1572.974589 | -1573.114426 | -1572.954494 |
| IN1h     | -1609.235812 | -1609.188991 | -1609.187872 | -1609.327804 | -1609.089004 |
| IN2h     | -1130.050433 | -1130.017759 | -1130.016640 | -1130.125586 | -1129.975887 |
| TS1h     | -1130.003637 | -1129.972255 | -1129.971137 | -1130.075102 | -1129.935280 |
| IN3h     | -1130.044372 | -1130.012795 | -1130.011677 | -1130.116034 | -1129.974790 |
| TS2h     | -2325.312249 | -2325.259141 | -2325.258023 | -2325.413705 | -2325.252141 |
| IN4h     | -2325.316302 | -2325.262917 | -2325.261799 | -2325.415857 | -2325.256062 |
| IN5h     | -2325.344419 | -2325.291200 | -2325.290082 | -2325.443035 | -2325.296048 |
| TS3h     | -2325.301554 | -2325.249710 | -2325.248592 | -2325.399832 | -2325.260143 |
| IN6h     | -2325.389977 | -2325.337988 | -2325.336870 | -2325.489422 | -2325.333624 |
| IN7h     | -2325.344721 | -2325.291573 | -2325.290455 | -2325.443595 | -2325.296068 |
| TS4h     | -2325.311215 | -2325.259448 | -2325.258330 | -2325.408601 | -2325.267524 |
| IN8h     | -2325.387561 | -2325.335427 | -2325.334309 | -2325.488152 | -2325.332466 |
| IN3a-4   | -1398.164651 | -1398.123483 | -1398.122364 | -1398.253553 | -1398.046762 |
| IN3a-5   | -1398.166232 | -1398.125329 | -1398.124211 | -1398.255094 | -1398.049008 |
| IN3a-6   | -1398.167590 | -1398.127008 | -1398.125890 | -1398.254924 | -1398.058867 |
| IN4a-4   | -1398.196965 | -1398.157681 | -1398.156563 | -1398.283045 | -1398.093427 |
| TS5a-1-1 | -2593.462418 | -2593.403244 | -2593.402126 | -2593.574873 | -2593.375867 |
| TS5a-1-2 | -2593.458014 | -2593.398998 | -2593.397879 | -2593.567560 | -2593.378415 |
| TS5a-1-3 | -2593.460624 | -2593.402704 | -2593.401585 | -2593.571679 | -2593.376820 |
| TS5a-2-1 | -2593.457398 | -2593.398661 | -2593.397543 | -2593.568224 | -2593.372427 |
| TS5a-2-2 | -2593.456006 | -2593.397199 | -2593.396080 | -2593.564964 | -2593.371919 |
| TS5a-2-3 | -2593.463518 | -2593.405047 | -2593.403929 | -2593.569753 | -2593.379897 |
| TS7a-1   | -2593.459534 | -2593.400623 | -2593.399504 | -2593.569816 | -2593.379467 |
| TS7a-2   | -2593.457528 | -2593.398438 | -2593.397320 | -2593.569236 | -2593.375083 |
| TS7a-3   | -2593.453433 | -2593.394032 | -2593.392914 | -2593.566102 | -2593.375663 |
| TS7a-4   | -2593.455112 | -2593.396013 | -2593.394894 | -2593.565765 | -2593.376369 |
| TS7a-5   | -2593.455587 | -2593.396684 | -2593.395565 | -2593.565281 | -2593.374393 |
| TS7a-6   | -2593.444734 | -2593.385598 | -2593.384480 | -2593.556346 | -2593.358854 |
| TS7a-7   | -2593.449330 | -2593.390744 | -2593.389626 | -2593.556011 | -2593.371462 |
| TS11a-1  | -2593.453970 | -2593.394978 | -2593.393860 | -2593.563388 | -2593.373233 |
| TS11a-2  | -2593.451684 | -2593.392544 | -2593.391426 | -2593.562263 | -2593.371669 |

|           |              |              |              |              |              |
|-----------|--------------|--------------|--------------|--------------|--------------|
| TS11a-3   | -2593.452200 | -2593.393282 | -2593.392163 | -2593.562314 | -2593.370654 |
| TS11a-4   | -2593.452153 | -2593.393111 | -2593.391992 | -2593.561924 | -2593.372344 |
| TS11a-5   | -2593.447944 | -2593.389109 | -2593.387990 | -2593.554697 | -2593.368653 |
| TS11a-6   | -2593.446555 | -2593.387616 | -2593.386497 | -2593.554848 | -2593.368172 |
| TS11a-7   | -2593.446750 | -2593.387933 | -2593.386814 | -2593.555576 | -2593.365349 |
| TS13a-1   | -2593.446340 | -2593.385739 | -2593.384621 | -2593.559418 | -2593.353897 |
| TS13a-2   | -2593.437496 | -2593.376753 | -2593.375635 | -2593.549464 | -2593.353035 |
| TS13a-3   | -2593.442750 | -2593.381936 | -2593.380817 | -2593.556387 | -2593.350482 |
| TS13a-4   | -2593.446714 | -2593.385758 | -2593.384639 | -2593.562244 | -2593.353035 |
| TS13a-5   | -2593.444228 | -2593.383273 | -2593.382155 | -2593.561006 | -2593.353753 |
| TS13a-6   | -2593.445352 | -2593.384471 | -2593.383352 | -2593.559622 | -2593.353441 |
| TS13a-7   | -2593.442853 | -2593.381849 | -2593.380731 | -2593.559710 | -2593.349918 |
| TS13a-8   | -2593.446693 | -2593.386092 | -2593.384973 | -2593.559714 | -2593.357564 |
| TS13a-9   | -2593.446997 | -2593.386443 | -2593.385325 | -2593.559987 | -2593.354505 |
| TS13a-10  | -2593.439780 | -2593.378922 | -2593.377803 | -2593.552878 | -2593.347798 |
| TS13a-11  | -2593.443804 | -2593.382991 | -2593.381872 | -2593.557669 | -2593.352470 |
| TS13a-12  | -2593.447031 | -2593.386179 | -2593.385061 | -2593.561735 | -2593.353305 |
| TS13a-13  | -2593.443987 | -2593.383190 | -2593.382072 | -2593.558316 | -2593.354041 |
| TS13a-14  | -2593.445531 | -2593.384727 | -2593.383609 | -2593.560320 | -2593.355756 |
| TS13a-15  | -2593.443107 | -2593.382295 | -2593.381176 | -2593.557342 | -2593.349958 |
| TS13a-16  | -2593.445886 | -2593.385058 | -2593.383940 | -2593.560523 | -2593.354162 |
| TS13a-17  | -2593.445415 | -2593.384523 | -2593.383405 | -2593.560866 | -2593.352151 |
| TS13a-18  | -2593.437442 | -2593.376433 | -2593.375315 | -2593.551723 | -2593.342556 |
| TS13a-19  | -2593.442213 | -2593.381325 | -2593.380206 | -2593.557754 | -2593.350673 |
| TS13a-20  | -2593.446158 | -2593.385060 | -2593.383942 | -2593.563579 | -2593.352581 |
| TS13a-21  | -2593.443569 | -2593.383605 | -2593.382486 | -2593.556650 | -2593.350456 |
| TS13a-22  | -2593.444720 | -2593.383882 | -2593.382764 | -2593.558473 | -2593.352885 |
| TS13a-23  | -2593.441874 | -2593.380890 | -2593.379772 | -2593.558614 | -2593.348028 |
| TS8a-1    | -2593.450107 | -2593.390494 | -2593.389375 | -2593.561048 | -2593.371231 |
| TS8a-2    | -2593.443235 | -2593.383765 | -2593.382646 | -2593.551937 | -2593.362987 |
| TS8a-3    | -2593.432924 | -2593.374164 | -2593.373045 | -2593.540178 | -2593.352296 |
| TS8a-4    | -2593.436115 | -2593.376276 | -2593.375158 | -2593.549587 | -2593.351079 |
| TS8a-5    | -2593.443038 | -2593.382950 | -2593.381832 | -2593.555215 | -2593.362908 |
| IN3a-1-D3 | -1398.240342 | -1398.200374 | -1398.199255 | -1398.325146 | -1398.083039 |
| IN3a-2-D3 | -1398.236621 | -1398.196913 | -1398.195795 | -1398.319106 | -1398.076463 |
| IN4a-4-D3 | -1398.258470 | -1398.219585 | -1398.218467 | -1398.341874 | -1398.107421 |
| IN4a-2-D3 | -1398.250026 | -1398.211519 | -1398.210401 | -1398.331161 | -1398.092401 |
| IN5a-1-D3 | -1398.239239 | -1398.199299 | -1398.198181 | -1398.326259 | -1398.075881 |
| IN5a-2-D3 | -1398.235946 | -1398.197189 | -1398.196070 | -1398.317539 | -1398.068852 |
| IN7a-1-D3 | -1398.259534 | -1398.220574 | -1398.219456 | -1398.344700 | -1398.102245 |
| IN7a-2-D3 | -1398.257231 | -1398.218429 | -1398.217310 | -1398.340091 | -1398.102731 |
| TS3a-3    | -1877.336333 | -1877.283459 | -1877.282341 | -1877.440864 | -1877.157161 |
| TS4a-3    | -1877.341236 | -1877.287462 | -1877.286343 | -1877.447820 | -1877.162924 |

|       |              |              |              |              |              |
|-------|--------------|--------------|--------------|--------------|--------------|
| TS19a | -1398.132667 | -1398.092482 | -1398.091363 | -1398.221221 | -1398.018412 |
| IN35a | -1398.140641 | -1398.100518 | -1398.099400 | -1398.225210 | -1398.025778 |
| TS20a | -1398.124404 | -1398.085246 | -1398.084128 | -1398.209677 | -1398.008088 |
| IN36a | -1398.123808 | -1398.083329 | -1398.082211 | -1398.211305 | -1398.006501 |
| IN37a | -2076.982985 | -2076.940784 | -2076.939666 | -2077.070175 | -2076.898652 |
| TS21a | -2076.972169 | -2076.930105 | -2076.928986 | -2077.059387 | -2076.880338 |
| IN38a | -2076.984809 | -2076.941266 | -2076.940148 | -2077.075572 | -2076.888024 |
| IN39a | -2593.452778 | -2593.392185 | -2593.391067 | -2593.564831 | -2593.370731 |
| TS22a | -2593.452174 | -2593.392685 | -2593.391567 | -2593.562405 | -2593.372587 |
| IN40a | -2593.489360 | -2593.429672 | -2593.428554 | -2593.600838 | -2593.407788 |
| TS23a | -2593.455940 | -2593.396724 | -2593.395606 | -2593.566232 | -2593.365092 |
| IN41a | -2593.455419 | -2593.395132 | -2593.394014 | -2593.570768 | -2593.363753 |
| IN42a | -1631.884001 | -1631.834938 | -1631.833819 | -1631.979463 | -1631.783263 |
| TS24a | -1631.879320 | -1631.831468 | -1631.830349 | -1631.971975 | -1631.782797 |
| TS25a | -2593.452323 | -2593.392916 | -2593.391797 | -2593.562361 | -2593.371096 |
| IN43a | -2593.509643 | -2593.450003 | -2593.448885 | -2593.619732 | -2593.430390 |
| TS26a | -1398.144800 | -1398.105722 | -1398.104603 | -1398.230163 | -1398.044964 |
| IN44a | -1398.166094 | -1398.126515 | -1398.125396 | -1398.249157 | -1398.054341 |
| IN45a | -1398.172444 | -1398.132808 | -1398.131690 | -1398.256782 | -1398.058148 |
| TS27a | -1398.149779 | -1398.110692 | -1398.109574 | -1398.235106 | -1398.048712 |
| IN46a | -1398.187162 | -1398.148079 | -1398.146960 | -1398.270542 | -1398.081288 |
| TS28a | -2593.468012 | -2593.409743 | -2593.408625 | -2593.577180 | -2593.380014 |
| IN47a | -2593.467845 | -2593.407857 | -2593.406739 | -2593.579273 | -2593.381082 |
| IN48a | -2593.468334 | -2593.409013 | -2593.407895 | -2593.582145 | -2593.379066 |
| TS29a | -2593.469569 | -2593.410616 | -2593.409498 | -2593.578438 | -2593.383613 |
| IN49a | -2593.520876 | -2593.461115 | -2593.459997 | -2593.632625 | -2593.442329 |
| TS30a | -2593.500505 | -2593.441360 | -2593.440241 | -2593.613130 | -2593.430576 |
| TS31a | -2593.460306 | -2593.402177 | -2593.401059 | -2593.567807 | -2593.371962 |
| IN50a | -2593.459622 | -2593.400370 | -2593.399251 | -2593.571142 | -2593.368232 |
| IN51a | -1398.165132 | -1398.124446 | -1398.123327 | -1398.254333 | -1398.058867 |
| TS32a | -1398.124645 | -1398.085473 | -1398.084354 | -1398.209060 | -1398.029085 |
| IN52a | -1398.183348 | -1398.143997 | -1398.142879 | -1398.270152 | -1398.075101 |
| TS33a | -2593.451540 | -2593.391975 | -2593.390856 | -2593.561666 | -2593.371215 |
| IN53a | -2593.513313 | -2593.453403 | -2593.452284 | -2593.625379 | -2593.430626 |
| TS34a | -1631.880901 | -1631.832976 | -1631.831858 | -1631.974211 | -1631.784863 |
| TS35a | -2593.500480 | -2593.439687 | -2593.438568 | -2593.615404 | -2593.410083 |
| IN54a | -2593.557957 | -2593.496540 | -2593.495422 | -2593.676910 | -2593.471261 |
| IN55a | -1877.355603 | -1877.300189 | -1877.299071 | -1877.467496 | -1877.169439 |
| TS36a | -1877.332695 | -1877.278178 | -1877.277060 | -1877.439919 | -1877.146525 |
| IN56a | -1877.330200 | -1877.275177 | -1877.274058 | -1877.439201 | -1877.149379 |
| IN57a | -1877.351839 | -1877.296541 | -1877.295423 | -1877.462061 | -1877.163244 |
| TS37a | -1877.330016 | -1877.275986 | -1877.274868 | -1877.433628 | -1877.141063 |
| IN58a | -1877.329623 | -1877.275213 | -1877.274094 | -1877.433686 | -1877.146369 |

|                                |              |              |              |              |               |
|--------------------------------|--------------|--------------|--------------|--------------|---------------|
| TS38a                          | -1398.115987 | -1398.075701 | -1398.074583 | -1398.200951 | -1397.989398  |
| IN59a                          | -1398.116421 | -1398.075885 | -1398.074767 | -1398.202756 | -1397.984857  |
| TS2a-1-1                       | -1398.140339 | -1398.101067 | -1398.099949 | -1398.225736 | -1398.040010  |
| TS2a-1-2                       | -1398.141336 | -1398.102124 | -1398.101006 | -1398.227355 | -1398.044318  |
| TS2a-1-3                       | -1398.139998 | -1398.100595 | -1398.099476 | -1398.226249 | -1398.045406  |
| TS2a-2-1                       | -1398.127599 | -1398.088354 | -1398.087235 | -1398.213854 | -1398.029168  |
| TS3a-1-1                       | -1398.154031 | -1398.114799 | -1398.113680 | -1398.240266 | -1398.053694  |
| TS3a-1-2                       | -1398.152841 | -1398.113634 | -1398.112516 | -1398.239131 | -1398.048811  |
| TS3a-1-3                       | -1398.152775 | -1398.113515 | -1398.112397 | -1398.239476 | -1398.050712  |
| TS2b-1                         | -1305.901926 | -1305.865137 | -1305.864018 | -1305.982863 | -1305.835423  |
| TS2b-2                         | -1305.901544 | -1305.864564 | -1305.863446 | -1305.984393 | -1305.831116  |
| TS2c-1                         | -1536.864452 | -1536.821174 | -1536.820056 | -1536.954288 | -1536.759565  |
| TS2c-2                         | -1536.867963 | -1536.824464 | -1536.823346 | -1536.960417 | -1536.757848  |
| TS2c-3                         | -1536.868936 | -1536.825463 | -1536.824344 | -1536.960241 | -1536.759609  |
| TS2d-1                         | -1573.018135 | -1572.973581 | -1572.972462 | -1573.110526 | -1572.950641  |
| TS2d-2                         | -1573.020180 | -1572.975288 | -1572.974169 | -1573.116537 | -1572.950196  |
| TS2e                           | -1437.425894 | -1437.384585 | -1437.383467 | -1437.512417 | -1437.338233  |
| TS2f                           | -1497.370593 | -1497.330116 | -1497.328998 | -1497.457444 | -1497.271410  |
| TS2g                           | -1490.364621 | -1490.322775 | -1490.321657 | -1490.453822 | -1490.237160  |
| <sup>4</sup> NiCl <sub>2</sub> | -1589.556950 | -1589.526269 | -1589.525151 | -1589.630205 | -1360.653042  |
| <sup>4</sup> TS2a-1            | -1398.090296 | -1398.050412 | -1398.049294 | -1398.176116 | -1397.984317  |
| <sup>4</sup> TS3a-1            | -1398.097413 | -1398.057325 | -1398.056207 | -1398.186757 | -1397.979947  |
| <sup>4</sup> TS4a-1            | -1398.099613 | -1398.059795 | -1398.058677 | -1398.186817 | -1397.980651  |
| <sup>4</sup> IN8a-2            | -2593.438663 | -2593.378507 | -2593.377389 | -2593.553791 | -2593.333642  |
| <sup>4</sup> TS6a-1            | -2593.463431 | -2593.403289 | -2593.402170 | -2593.579856 | -2593.369061  |
| <sup>4</sup> IN22a             | -2593.425156 | -2593.362872 | -2593.361753 | -2593.546418 | -2593.3131686 |

$E_0$  = Sum of electronic and zero-point energies calculated by B3LYP in solvent

$E$  = Sum of electronic and thermal energies calculated by B3LYP in solvent

$H_{353.15}$  = Sum of electronic and thermal enthalpies calculated by B3LYP in solvent

$G_{353.15}$  = Sum of electronic and thermal free energies calculated by B3LYP in solvent

$E_{(M06)}$  = Single point energies calculated by M06 in solvent

## Section 17. Calculated imaginary frequencies of all transition states species.

| Species | Frequency |
|---------|-----------|
|---------|-----------|

|                  |          |
|------------------|----------|
| <sup>1</sup> TSa | -131.33  |
| <sup>3</sup> TSa | -47.76   |
| <sup>1</sup> TSb | -71.75   |
| <sup>3</sup> TSb | -81.21   |
| <sup>1</sup> TSc | -252.56  |
| <sup>3</sup> TSc | -257.67  |
| TS1              | -73.32   |
| TS2a-1           | -359.19  |
| TS2a-2           | -336.60  |
| TS2a-3           | -350.42  |
| TS3a-1           | -941.87  |
| TS3a-2           | -879.42  |
| TS4a-1           | -874.38  |
| TS4a-2           | -831.87  |
| TS5a-1           | -310.14  |
| TS5a-2           | -289.56  |
| TS6a-1           | -217.43  |
| TS6a-2           | -259.21  |
| TS7a             | --274.82 |
| TS8a             | -214.50  |
| TS9a             | -917.39  |
| TS10a            | -891.68  |
| TS11a            | -266.88  |
| TS12a            | -236.96  |
| TS13a            | -273.28  |
| TS14a            | -164.50  |
| TS15a            | -262.84  |
| TS16a            | -107.16  |
| TS17a            | -31.22   |
| TS18a            | -204.13  |
| TS19a            | -820.11  |
| TS20a            | -407.95  |
| TS21a            | -318.52  |
| TS22a            | -114.82  |
| TS23a            | -52.84   |
| TS24a            | -219.10  |
| TS25a            | -97.34   |
| TS26a            | -855.15  |
| TS27a            | -938.36  |
| TS28a            | -256.22  |
| TS29a            | -29.12   |
| TS30a            | -211.46  |
| TS31a            | -47.25   |

|          |          |
|----------|----------|
| TS32a    | -346.90  |
| TS33a    | -163.52  |
| TS34a    | -171.17  |
| TS35a    | -172.13  |
| TS36a    | -890.11  |
| TS37a    | -1223.77 |
| TS38a    | -469.10  |
| TS3a-3   | -867.11  |
| TS4a-3   | -849.58  |
| TS5a-1-1 | -295.66  |
| TS5a-1-2 | -330.08  |
| TS5a-1-3 | -261.11  |
| TS5a-2-1 | -267.57  |
| TS5a-2-2 | -248.56  |
| TS5a-2-3 | -272.42  |
| TS7a-1   | -324.03  |
| TS7a-2   | -251.77  |
| TS7a-3   | -246.26  |
| TS7a-4   | -334.79  |
| TS7a-5   | -267.87  |
| TS7a-6   | -166.41  |
| TS7a-7   | -265.91  |
| TS11a-1  | -335.21  |
| TS11a-2  | -330.62  |
| TS11a-3  | -251.93  |
| TS11a-4  | -311.16  |
| TS11a-5  | -283.55  |
| TS11a-6  | -248.84  |
| TS11a-7  | -202.56  |
| TS13a-1  | -245.31  |
| TS13a-2  | -259.66  |
| TS13a-3  | -238.34  |
| TS13a-4  | -258.70  |
| TS13a-5  | -239.46  |
| TS13a-6  | -292.30  |
| TS13a-7  | -182.97  |
| TS13a-8  | -275.74  |
| TS13a-9  | -248.40  |
| TS13a-10 | -268.77  |
| TS13a-11 | -242.72  |
| TS13a-12 | -260.65  |
| TS13a-13 | -241.10  |
| TS13a-14 | -289.78  |

|                     |         |
|---------------------|---------|
| TS13a-15            | -180.23 |
| TS13a-16            | -281.94 |
| TS13a-17            | -242.92 |
| TS13a-18            | -264.51 |
| TS13a-19            | -246.05 |
| TS13a-20            | -255.28 |
| TS13a-21            | -241.28 |
| TS13a-22            | -288.72 |
| TS13a-23            | -184.32 |
| TS8a-1              | -339.89 |
| TS8a-2              | -102.01 |
| TS8a-3              | -423.98 |
| TS8a-4              | -397.09 |
| TS8a-5              | -412.55 |
| TS2b                | -381.67 |
| TS2c                | -351.18 |
| TS2d                | -352.38 |
| TS1h                | -391.86 |
| TS2h                | -321.93 |
| TS3h                | -377.57 |
| TS4h                | -378.88 |
| TS2a-1-1            | -361.82 |
| TS2a-1-2            | -346.79 |
| TS2a-1-3            | -362.22 |
| TS2a-2-1            | -365.78 |
| TS3a-1-1            | -941.87 |
| TS3a-1-2            | -918.13 |
| TS3a-1-3            | -898.09 |
| TS2b-1              | -355.94 |
| TS2b-2              | -391.25 |
| TS2c-1              | -350.53 |
| TS2c-2              | -368.80 |
| TS2c-3              | -358.75 |
| TS2d-1              | -350.49 |
| TS2d-2              | -380.04 |
| TS2e                | -348.90 |
| TS2f                | -342.03 |
| TS2g                | -336.89 |
| <sup>4</sup> TS2a-1 | -369.51 |
| <sup>4</sup> TS3a-1 | -907.52 |
| <sup>4</sup> TS4a-1 | -906.72 |
| <sup>4</sup> TS6a-1 | -408.83 |
